# Supplementary material for: Upcycling polymethyl methacrylate to methacrylic acid
Source: Royal Society of Chemistry journal article supplement (doi:10.1039/d4re00341a), 2024-11-13
Supplement: d4re00341a1.pdf [file d4re00341a1.pdf]

## 1 Supplementary Documents

Supplementary Table 1 Carbon balance of PMMA hydrolysis over different zeolites

| Samples                     | $T$<br>°C | $X_{\text{PMMA}}^a$<br>% | $Y_{\text{MAA}}$<br>% | $Y_{\text{MeOH}}$<br>% | $Y_{\text{MMA}}$<br>% | $Y_{\text{Acetone}}$<br>% | $S_{\text{MAA}}$<br>% | $S_{\text{MeOH}}$<br>% | $S_{\text{MMA}}$<br>% | $S_{\text{Acetone}}$<br>% | C in residues <sup>b</sup><br>mol % | CO<br>mol % | CO <sub>2</sub><br>mol % | CH <sub>4</sub><br>mol % | Recovered C<br>mol % |
|-----------------------------|-----------|--------------------------|-----------------------|------------------------|-----------------------|---------------------------|-----------------------|------------------------|-----------------------|---------------------------|-------------------------------------|-------------|--------------------------|--------------------------|----------------------|
| HY(80)                      | 350       | 97                       | 54                    | 15                     | 2                     | 3                         | 56                    | 15                     | 3                     | 3                         | 10                                  | 3.4         | 0.8                      | 0.0                      | 88                   |
| HY(80)-rep                  | 350       | 97                       | 56                    | 16                     | 3                     | 2                         | 58                    | 16                     | 3                     | 2                         | 10                                  | 3.4         | 0.9                      | 0.0                      | 91                   |
| HY(80)                      | 330       | 74                       | 43                    | 12                     | 1                     | 3                         | 58                    | 16                     | 1                     | 5                         | 32                                  | 3.3         | 0.8                      | 0.0                      | 95                   |
| HY(80)                      | 370       | 99                       | 55                    | 14                     | 4                     | 2                         | 56                    | 14                     | 4                     | 2                         | 6                                   | 3.5         | 0.9                      | 0.1                      | 86                   |
| HY(60)                      | 350       | 96                       | 49                    | 14                     | 2                     | 5                         | 51                    | 15                     | 2                     | 5                         | 15                                  | 3.9         | 0.8                      | 0.0                      | 89                   |
| HY(30)                      | 350       | 96                       | 41                    | 13                     | 2                     | 5                         | 42                    | 14                     | 2                     | 5                         | 20                                  | 4.2         | 0.9                      | 0.0                      | 86                   |
| H $\beta$ (360)             | 350       | 92                       | 51                    | 14                     | 2                     | 6                         | 55                    | 16                     | 2                     | 6                         | 15                                  | 3.6         | 0.7                      | 0.0                      | 92                   |
| HZSM-5(200)                 | 350       | 96                       | 45                    | 13                     | 3                     | 11                        | 47                    | 14                     | 3                     | 12                        | 6                                   | 4.5         | 1.0                      | 0.0                      | 84                   |
| HZSM-5(80)                  | 350       | 98                       | 24                    | 7                      | 1                     | 13                        | 25                    | 7                      | 1                     | 13                        | 6                                   | 7.5         | 0.9                      | 0.0                      | 60                   |
| HMOR(20)                    | 350       | 98                       | 40                    | 2                      | 3                     | 3                         | 41                    | 2                      | 3                     | 3                         | 13                                  | 4.5         | 0.9                      | 0.1                      | 67                   |
| R-HY(80)                    | 350       | 95                       | 51                    | 15                     | 2                     | 2                         | 53                    | 15                     | 3                     | 2                         | 12                                  | 3.4         | 0.8                      | 0.0                      | 86                   |
| Mo.5                        | 350       | 98                       | 21                    | 7                      | 19                    | 0                         | 21                    | 8                      | 19                    | 0                         | 7                                   | 3.4         | 0.9                      | 0.0                      | 59                   |
| M1                          | 350       | 99                       | 18                    | 5                      | 25                    | 0                         | 18                    | 5                      | 25                    | 0                         | 5                                   | 3.3         | 0.8                      | 0.0                      | 57                   |
| M2                          | 350       | 98                       | 19                    | 7                      | 17                    | 0                         | 20                    | 8                      | 18                    | 0                         | 7                                   | 3.4         | 1.3                      | 0.0                      | 56                   |
| HY(80) on PMMA <sup>c</sup> | 350       | 97                       | 47                    | 6                      | 0                     | 0                         | 48                    | 6                      | 0                     | 0                         | 6                                   | 5.8         | 1.5                      | 0.0                      | 66                   |
| PMMA (blank)                | 350       | 95                       | 0                     | 0                      | 56                    | 0                         | 0                     | 0                      | 59                    | 0                         | 5                                   | 0.0         | 0.7                      | 0.0                      | 61                   |

Note: T-temperature, rep.-repetition, a-determined by TGA, b-measured by LECO, c-HY(80) layer covered on the surface of PMMA powder.

Liquid products detected by GCMS contains MAA, methanol, MMA and acetone. GC-TCD quantified CO, CO<sub>2</sub> and CH<sub>4</sub> in the gas phase. LECO measured total carbon residues for carbon balance and TGA determined the amount of unreacted PMMA and coke for conversion calculation.

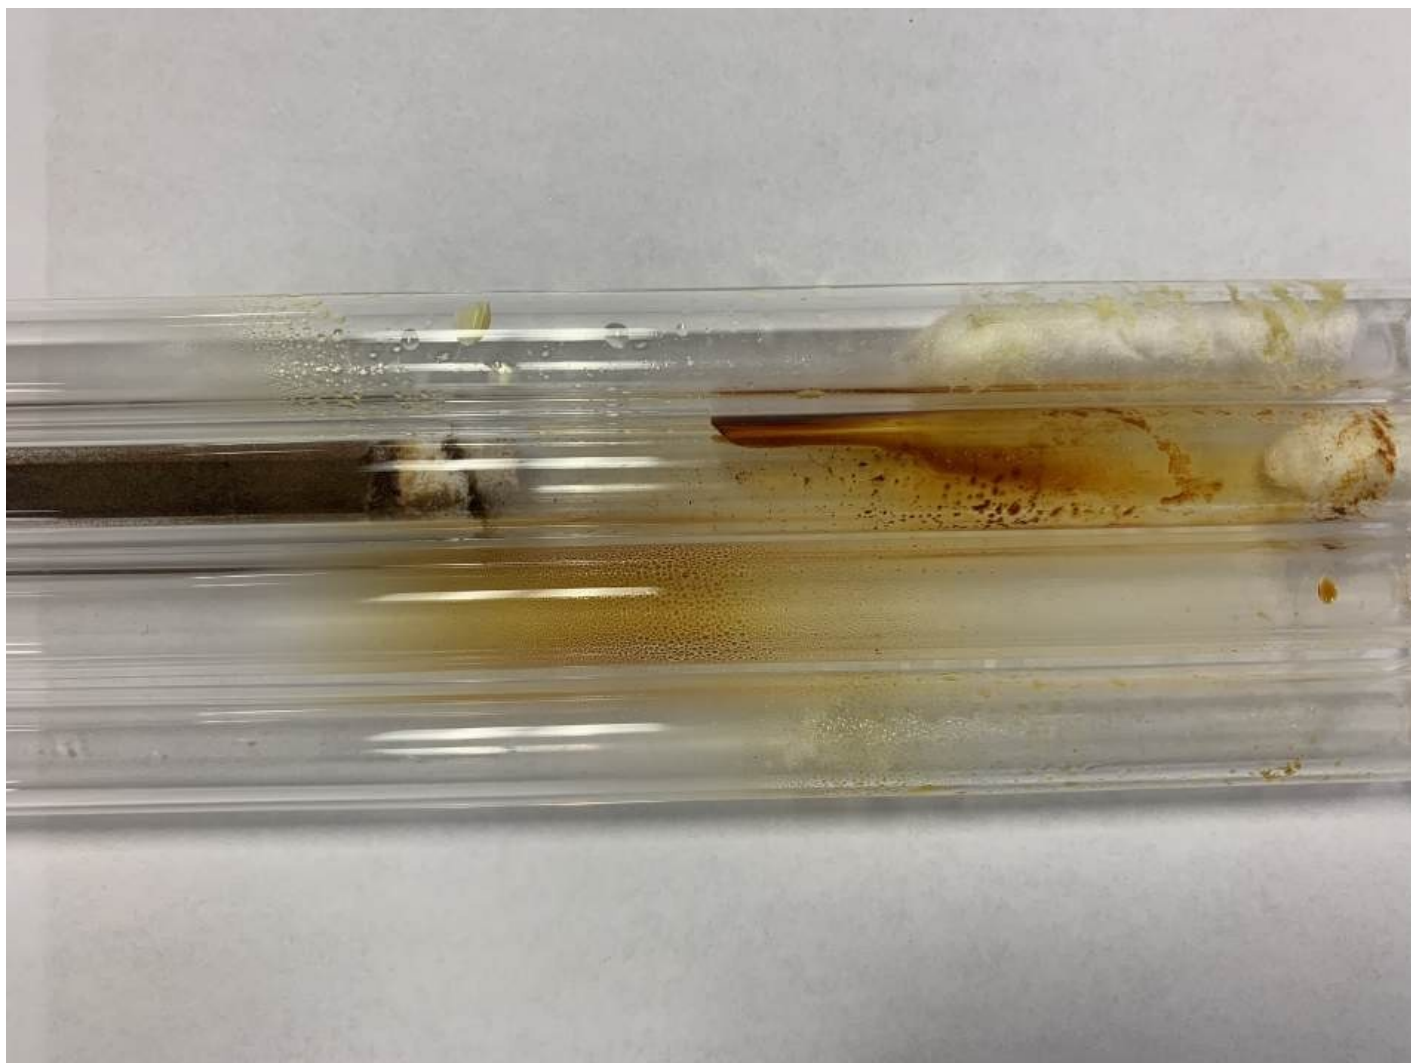

Supplementary Fig. 1 MMA repolymerization byproducts in PMMA-to-MMA recycling routes. The yellow repolymerization residues that formed in reactors and condensers during PMMA catalytic/non-catalytic pyrolysis reduced MMA yield and resulted in higher MMA purification cost.

Supplementary Table 2 Physico-chemical properties of fresh zeolites, regenerated HY(80), desilicated HY(80) and coked HY(80) zeolites

| Sample                  | Si/Al <sup>a</sup> | $S_{\text{BET}}$               | $V_{\text{tot}}$                | Average $D_v$ | $V_{\text{micro}}$              | $S_{\text{micro}}$             | $S_{\text{meso}}$              | $d_p^b$     |           |         |         |
|-------------------------|--------------------|--------------------------------|---------------------------------|---------------|---------------------------------|--------------------------------|--------------------------------|-------------|-----------|---------|---------|
|                         |                    |                                |                                 |               |                                 |                                |                                | Medium size | Mean size | $D[10]$ | $D[90]$ |
|                         |                    | m <sup>2</sup> g <sup>-1</sup> | cm <sup>3</sup> g <sup>-1</sup> | Å             | cm <sup>3</sup> g <sup>-1</sup> | m <sup>2</sup> g <sup>-1</sup> | m <sup>2</sup> g <sup>-1</sup> | µm          | µm        | µm      | µm      |
| Commercial zeolites     |                    |                                |                                 |               |                                 |                                |                                |             |           |         |         |
| HY(80)                  | 102                | 741                            | 0.59                            | 15            | 0.26                            | 498                            | 242                            | 2.87        | 3.00      | 2.03    | 4.18    |
| HY(60)                  | -                  | 767                            | 0.58                            | 15            | 0.26                            | 504                            | 263                            | 4.08        | 4.82      | 2.33    | 8.39    |
| HY(30)                  | -                  | 731                            | 0.58                            | 19            | 0.27                            | 523                            | 208                            | 3.25        | 4.54      | 1.89    | 9.10    |
| Hβ(360)                 | 150                | 550                            | 0.39                            | 17            | 0.21                            | 413                            | 137                            | 1.04        | 1.10      | 0.84    | 1.38    |
| Activated zeolites      |                    |                                |                                 |               |                                 |                                |                                |             |           |         |         |
| HZSM-5(200)             | 104                | 381                            | 0.24                            | 15            | 0.06                            | 110                            | 270                            | 2.18        | 2.23      | 1.76    | 2.78    |
| HZSM-5(80)              | -                  | 403                            | 0.29                            | 17            | 0.12                            | 242                            | 161                            | 1.68        | 1.71      | 1.22    | 2.21    |
| HMOR(20)                | 11                 | 440                            | 0.36                            | 17            | 0.19                            | 384                            | 56                             | 2.67        | 4.12      | 1.54    | 9.11    |
| Regenerated HY zeolite  |                    |                                |                                 |               |                                 |                                |                                |             |           |         |         |
| R-HY(80)                | 107                | 786                            | 0.60                            | 15            | 0.27                            | 534                            | 252                            | -           | -         | -       | -       |
| Desilicated HY zeolites |                    |                                |                                 |               |                                 |                                |                                |             |           |         |         |
| Mo.5                    | 58                 | 128                            | 0.43                            | 39            | 0.004                           | 10                             | 118                            | 2.49        | 3.38      | 1.51    | 6.73    |
| M1                      | 46                 | 43                             | 0.29                            | 86            | 0.003                           | 6                              | 37                             | 2.17        | 2.42      | 1.37    | 3.77    |
| M2                      | 27                 | 82                             | 0.45                            | 87            | 0.004                           | 10                             | 72                             | 2.34        | 2.49      | 1.70    | 3.45    |
| M3                      | 6                  | 95                             | 0.21                            | 17            | 0.003                           | 8                              | 87                             | 2.60        | 2.66      | 2.05    | 3.36    |
| Coked HY zeolite        |                    |                                |                                 |               |                                 |                                |                                |             |           |         |         |
| C-HY(80)                | 58                 | -                              | -                               | -             | -                               | -                              | -                              | -           | -         | -       | -       |

Note:  $d_p$ -particle size; a-calculated by XPS; b-measured by PSD

Supplementary Table 3 Acidic properties of fresh, regenerated, coked, and desilicated Zeolite Y ( $\mu\text{molg}^{-1}$ ).

| Sample   | Weak <sup>a</sup> | Medium strong <sup>a</sup> | Brønsted <sup>b</sup> |                    | B/L ratio | Brønsted <sup>b</sup> |                    | B/L ratio |
|----------|-------------------|----------------------------|-----------------------|--------------------|-----------|-----------------------|--------------------|-----------|
|          |                   |                            | 150 °C                | Lewis <sup>b</sup> |           | 350 °C                | Lewis <sup>b</sup> |           |
| HY(80)   | 95                | 52                         | 15                    | 170                | 0.09      | 6.4                   | 49                 | 0.13      |
| HY(60)   | 240               | 340                        | -                     | -                  | -         | -                     | -                  | -         |
| HY(30)   | 850               | 910                        | -                     | -                  | -         | -                     | -                  | -         |
| R-HY(80) | 150               | 210                        | 8.8                   | 250                | 0.04      | 3.2                   | 62                 | 0.05      |
| Mo.5     | 300               | 0                          | 20                    | 53                 | 0.37      | 8.3                   | 18                 | 0.46      |
| C-HY(80) | 230               | 0                          | 3.4                   | 83                 | 0.04      | 2.7                   | 12                 | 0.21      |

Note: a-measured by  $\text{NH}_3$ -TPD; b-measured by Py-IR

Supplementary Table 4 Pore dimension of different zeolites

| Zeolite         | Framework Type | Channel diameter, Å                                              |
|-----------------|----------------|------------------------------------------------------------------|
| Zeolite Y       | FAU            | 12-ring [111] channels: $7.4 \times 7.4$                         |
| Zeolite $\beta$ | BEA            | 12-ring [100] channels: $6.6 \times 6.7$                         |
| Zeolite $\beta$ | BEA            | 12-ring [001] channels: $5.6 \times 5.6$                         |
| Mordenite       | MOR            | 12-ring [001] channels: $6.5 \times 7.0$                         |
| Mordenite       | MOR            | 8-ring [001] channels between 12-ring channels: $2.6 \times 5.7$ |
| ZSM-5           | MFI            | 10-ring [010] channels: $5.3 \times 5.6$                         |
| ZSM-5           | MFI            | 10-ring [100] channels: $5.1 \times 5.5$                         |

Data source: Database of Zeolite Structures (<http://www.iza-structure.org/databases/>)

Supplementary Table 5 Molecular weight of PMMA in reacted HY(60) sample

| PMMA residues in | $M_n$ | $M_w$ | Dispersity |
|------------------|-------|-------|------------|
| HY(60)           | 18000 | 39000 | 2.15       |

Supplementary Table 6 XPS elemental identification and quantification in HY(80)

| Name  | Structure                     | Peak BE<br>eV | FWHM<br>eV | Area (P), CPS<br>eV | Atomic % |
|-------|-------------------------------|---------------|------------|---------------------|----------|
| Al2p  | Al in zeolite                 | 74.7          | 2.46       | 542                 | 0.3      |
| Si2p3 | Si in zeolite                 | 103.3         | 1.71       | 50300               | 30.7     |
| C1s A | C-C and/or C-C                | 284.1         | 1.65       | 7740                | 2.9      |
| C1s B | C-O                           | 285.4         | 1.65       | 2980                | 1.1      |
| C1s C | C-O and/or O-C-O              | 287.5         | 1.65       | 796                 | 0.3      |
| O1s A | O in zeolite                  | 533.0         | 2.01       | 440000              | 61.6     |
| O1s B | Adsorbed $\text{H}_2\text{O}$ | 535.4         | 2.01       | 21600               | 3.0      |

Abbreviations: BE, binding energy; FWHM, full-width-at-half-maximum; CPS, counts per second

Supplementary Table 7 XPS elemental identification and quantification in R-HY(80)

| Name   | Structure                     | Peak BE<br>eV | FWHM<br>eV | Area (P), CPS<br>eV | Atomic % |
|--------|-------------------------------|---------------|------------|---------------------|----------|
| Al2p A | Al in zeolite                 | 74.9          | 2.60       | 540                 | 0.3      |
| Si2p3  | Si in zeolite                 | 103.3         | 1.60       | 5660                | 32.0     |
| C1s A  | C-C and C=C                   | 284.2         | 1.89       | 3570                | 1.2      |
| C1s B  | C-O                           | 286.0         | 1.89       | 1320                | 0.5      |
| C1s C  | O-C=O                         | 288.5         | 1.89       | 490                 | 0.2      |
| O1s A  | O in zeolite                  | 533.1         | 1.94       | 484000              | 62.8     |
| O1s B  | Adsorbed $\text{H}_2\text{O}$ | 535.6         | 1.94       | 23500               | 3.0      |

Abbreviations: BE, binding energy; FWHM, full-width-at-half-maximum; CPS, counts per second

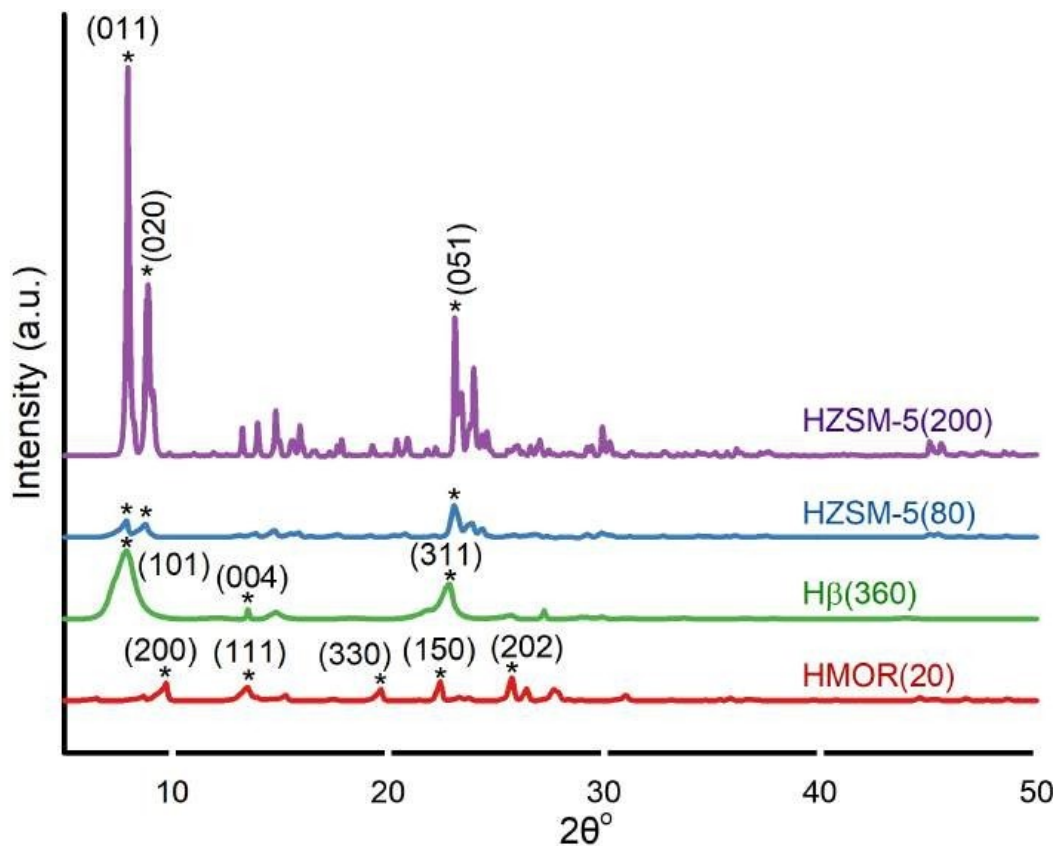

Supplementary Fig. 2 X-ray powder diffraction over HZSM-5(200), HZSM-5(80), H $\beta$ (360) and HMOR(20)

Supplementary Table 8 XPS elemental identification and quantification in C-HY(80)

| Name   | Structure     | Peak BE<br>eV | FWHM<br>eV | Area (P), CPS<br>eV | Atomic % |
|--------|---------------|---------------|------------|---------------------|----------|
| Al2p A | Al in zeolite | 74.4          | 2.43       | 570                 | 0.4      |
| Si2p3  | Si in zeolite | 103.3         | 1.73       | 50000               | 29.2     |
| C1s A  | C-C and C=C   | 284.2         | 1.68       | 17000               | 6.0      |
| C1s B  | C-O           | 285.9         | 1.68       | 3240                | 1.2      |
| C1s C  | O-C=O         | 288.3         | 1.68       | 1670                | 0.6      |
| O1s A  | O in zeolite  | 532.8         | 1.82       | 470000              | 62.7     |

Abbreviations: BE, binding energy; FWHM, full-width-at-half-maximum; CPS, counts per second

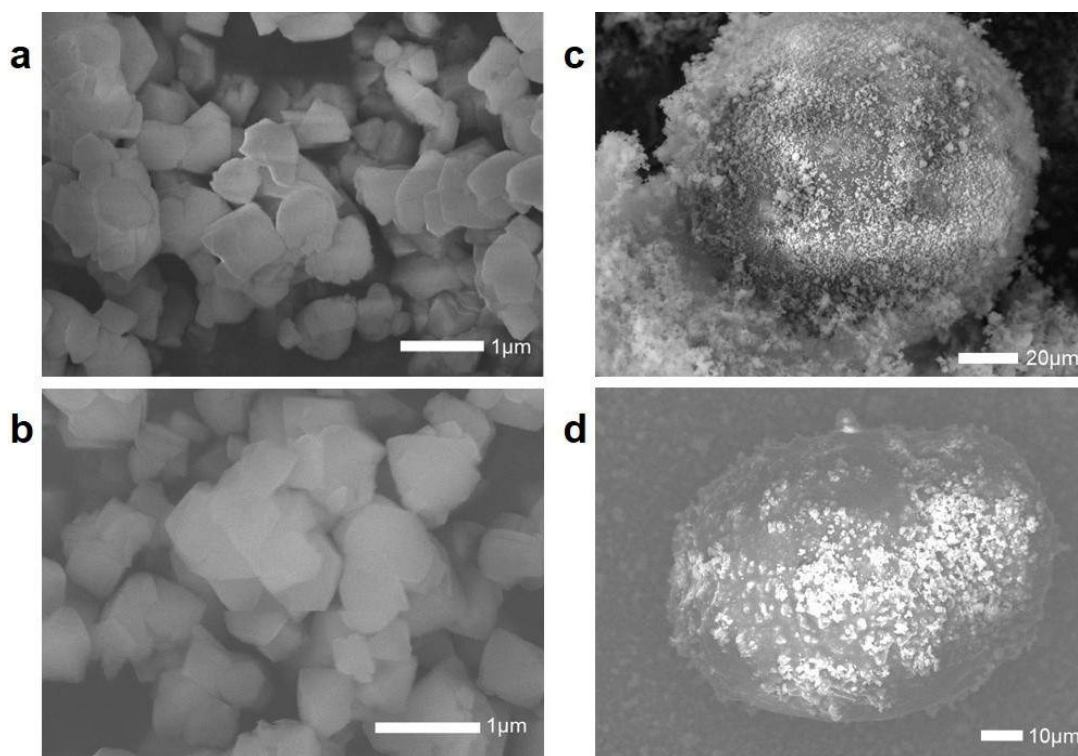

Supplementary Fig. 3 SEM images of fresh HY(80) (a), R-HY(80) (b), unreacted PMMA sphere covered by HY(80) particles (c), and PMMA sphere covered by HY(80) particles preheated at 350 °C for 2 min under steam atmosphere (d).

Supplementary Table 9 XPS elemental identification and quantification in M0.5

| Name    | Structure                              | Peak BE<br>eV | FWHM<br>eV | Area (P), CPS<br>eV | Atomic % |
|---------|----------------------------------------|---------------|------------|---------------------|----------|
| Al2p A  | Al in zeolite                          | 75.4          | 2.91       | 1500                | 0.5      |
| Si2p3 A | Si in zeolite                          | 103.3         | 1.83       | 78000               | 25.1     |
| Si2p3 B | Si in other forms                      | 104.8         | 1.83       | 13500               | 4.4      |
| C1s A   | C-C                                    | 284.5         | 1.99       | 24000               | 4.9      |
| C1s B   | C-O                                    | 286.2         | 1.99       | 7700                | 1.6      |
| C1s C   | O-C=O                                  | 288.3         | 1.99       | 3600                | 0.7      |
| O1s A   | O in zeolite                           | 532.9         | 2.18       | 800000              | 62.4     |
| Na1s    | Na from NaOH                           | 1072.2        | 3.15       | 4400                | 0.1      |
| N1s     | N from NH <sub>3</sub> NO <sub>3</sub> | 399.7         | 2.79       | 1300                | 0.2      |

Abbreviations: BE, binding energy; FWHM, full-width-at-half-maximum; CPS, counts per second

Supplementary Table 10 XPS elemental identification and quantification in M1

| Name  | Structure                              | Peak BE<br>eV | FWHM<br>eV | Area (P), CPS<br>eV | Atomic % |
|-------|----------------------------------------|---------------|------------|---------------------|----------|
| Al2p  | Al in zeolite                          | 75.0          | 2.49       | 1900                | 0.7      |
| Si2p3 | Si in zeolite                          | 103.3         | 1.82       | 92000               | 30.2     |
| C1s A | C-C                                    | 284.9         | 1.99       | 11000               | 2.3      |
| C1s B | C-O                                    | 286.6         | 1.99       | 4100                | 0.8      |
| C1s C | O-C=O                                  | 288.8         | 1.99       | 1800                | 0.4      |
| O1s A | O in zeolite                           | 532.9         | 2.06       | 820000              | 65.0     |
| Na1s  | Na from NaOH                           | 1072.8        | 2.46       | 5300                | 0.2      |
| N1s   | N from NH <sub>3</sub> NO <sub>3</sub> | 402.5         | 2.65       | 600                 | 0.1      |

Abbreviations: BE, binding energy; FWHM, full-width-at-half-maximum; CPS, counts per second



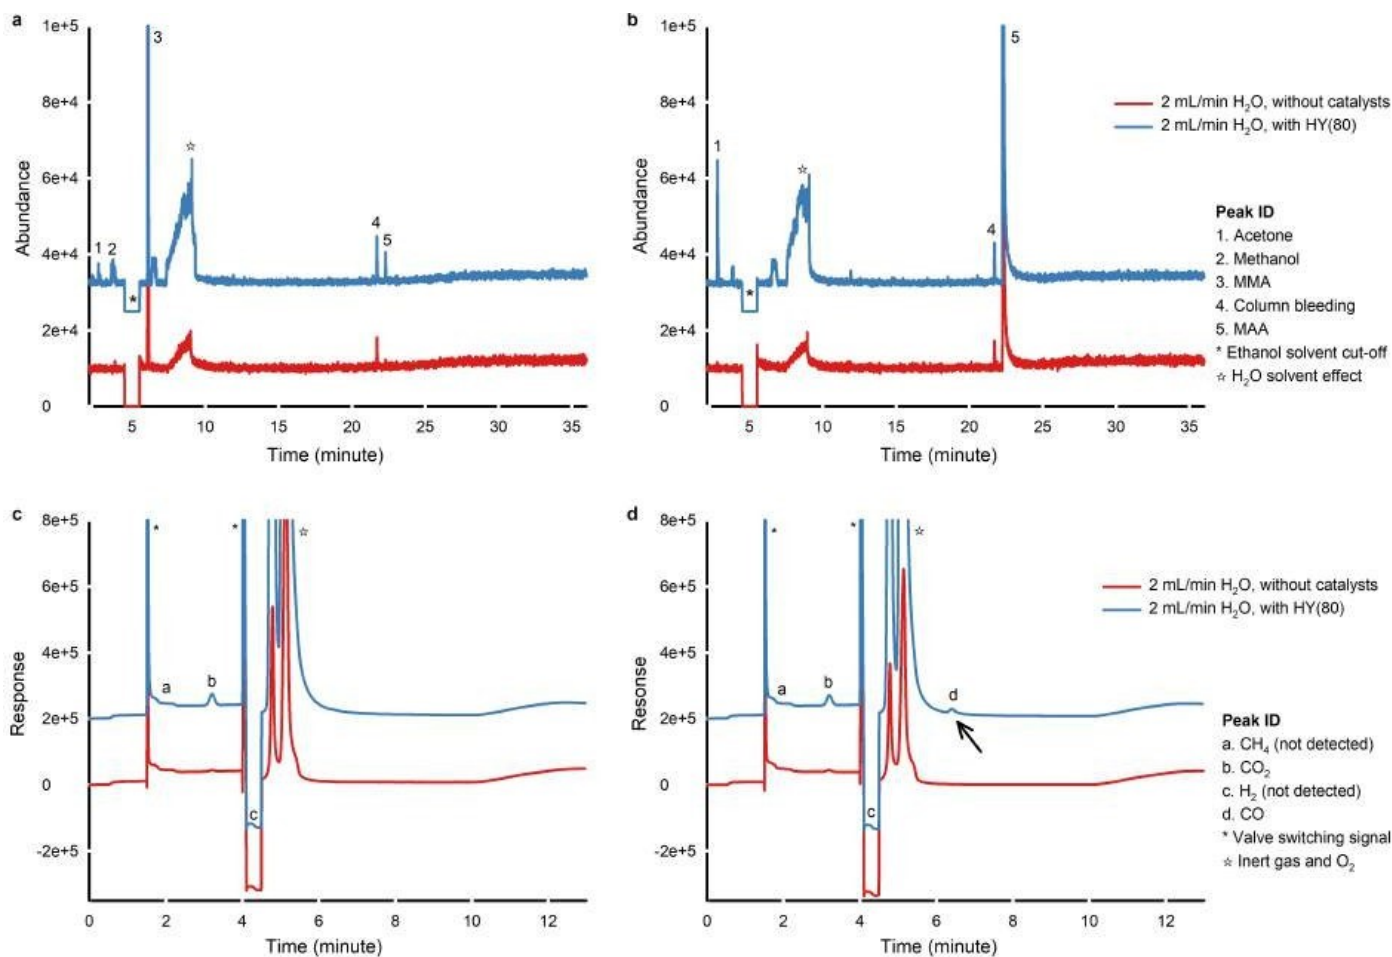

Supplementary Fig. 4 Catalytic and non-catalytic hydrolysis of MMA and MAA. a, GCMS results of MMA hydrolysis with and without HY(80) at 350 °C with 2 mLmin<sup>-1</sup> of water injection. b, GCMS results of MAA hydrolysis with and without HY(80) at 350 °C with 2 mLmin<sup>-1</sup> of water injection. c, GC-TCD gas detection results of MMA hydrolysis with and without HY(80) at 350 °C with 2 mLmin<sup>-1</sup> of water injection. Catalytic hydrolysis of MMA over HY(80) produced a small amount of CO<sub>2</sub>. d, GC-TCD gas detection results of MAA hydrolysis with and without HY(80) at 350 °C with 2 mLmin<sup>-1</sup> of water injection. Catalytic hydrolysis of MAA over HY(80) produced a small amount of CO and CO<sub>2</sub>.

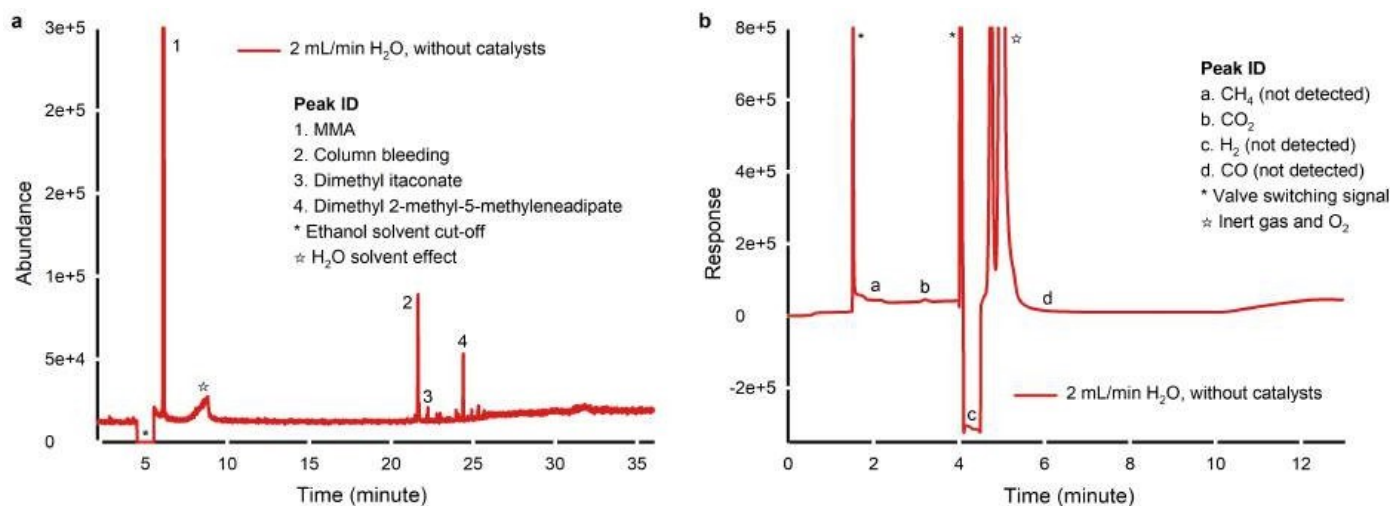

Supplementary Fig. 5 PMMA blank hydrolysis without catalysts at 350 °C under steam conditions (2 mLmin<sup>-1</sup> of water injection). a, GCMS results of PMMA non-catalytic degradation. b, GC-TCD gas detection results of PMMA non-catalytic degradation.



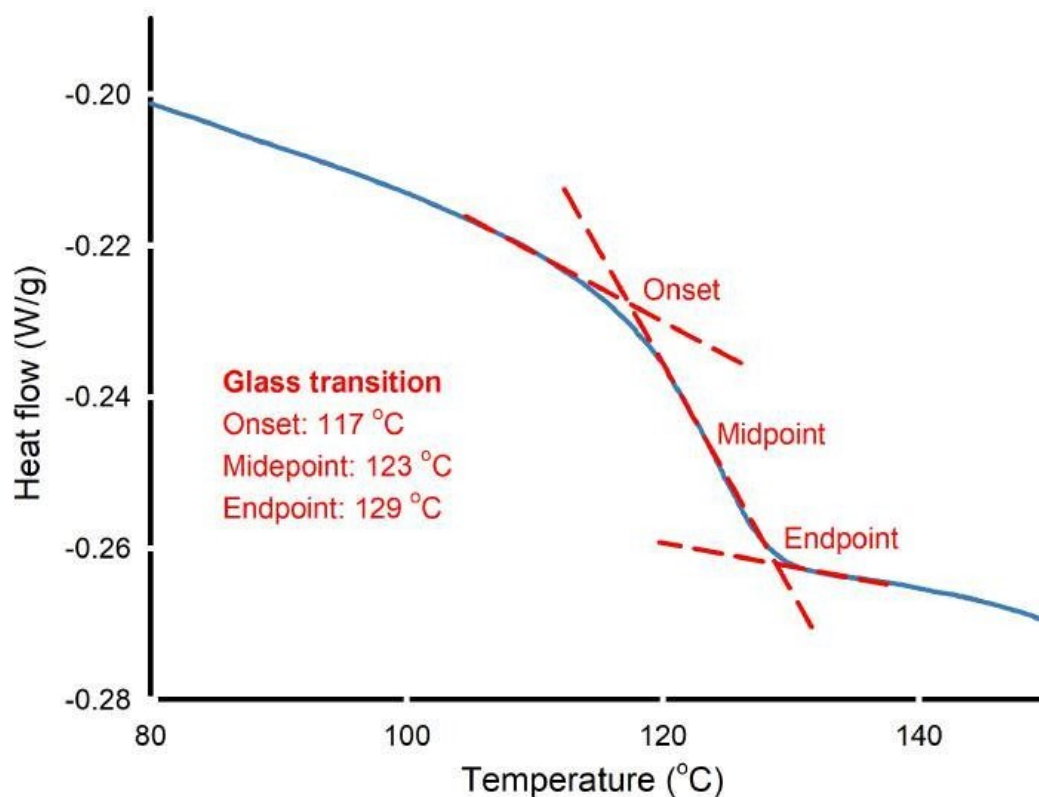

Supplementary Fig. 6 DSC results of PMMA powder showed onset  $T_g=117^\circ\text{C}$ , midpoint  $T_g=123^\circ\text{C}$  and endpoint  $T_g=129^\circ\text{C}$ .

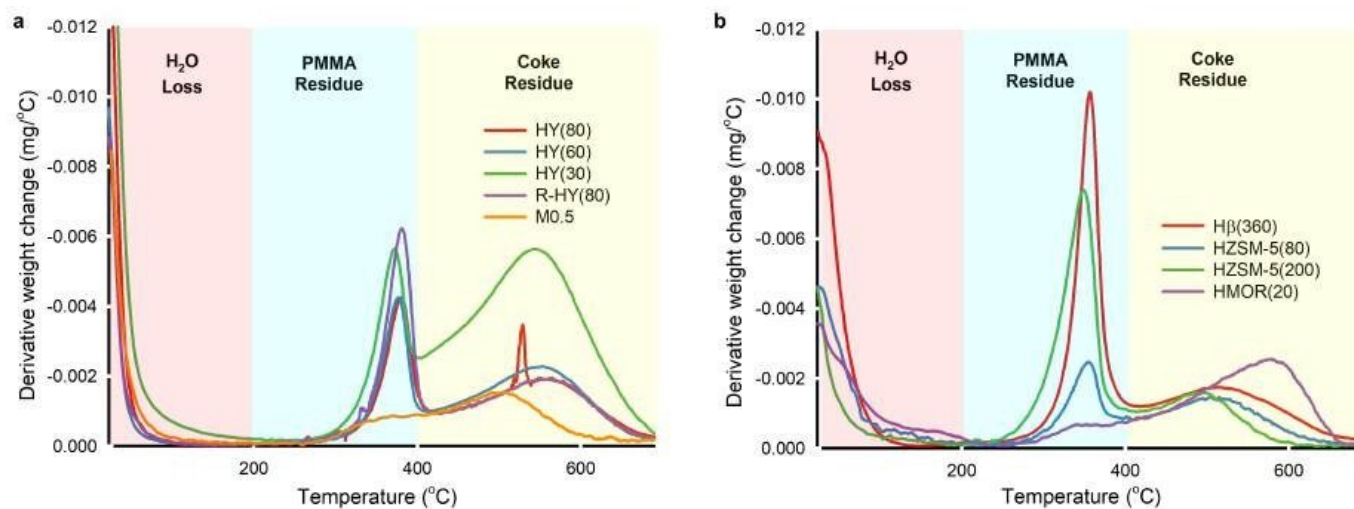

Supplementary Fig. 7 The first derivative of the TGA curves of solid residues for fresh, regenerated and desiccated zeolite Y reacted at  $350^\circ\text{C}$  (a), and activated HZSM-5(200), HZSM-5(80), HMOR(20) and fresh H $\beta$  (360) reacted at  $350^\circ\text{C}$  (b) under air atmosphere ( $60\text{ mL min}^{-1}$ ) with a heating ramp of  $5^\circ\text{C min}^{-1}$ . Weight loss under  $200^\circ\text{C}$  was attributed to H $_2$ O loss, while weight loss between  $200^\circ\text{C}$  and  $400^\circ\text{C}$  was attributed to PMMA residues. Coke residues corresponded to temperature higher than  $400^\circ\text{C}$ .

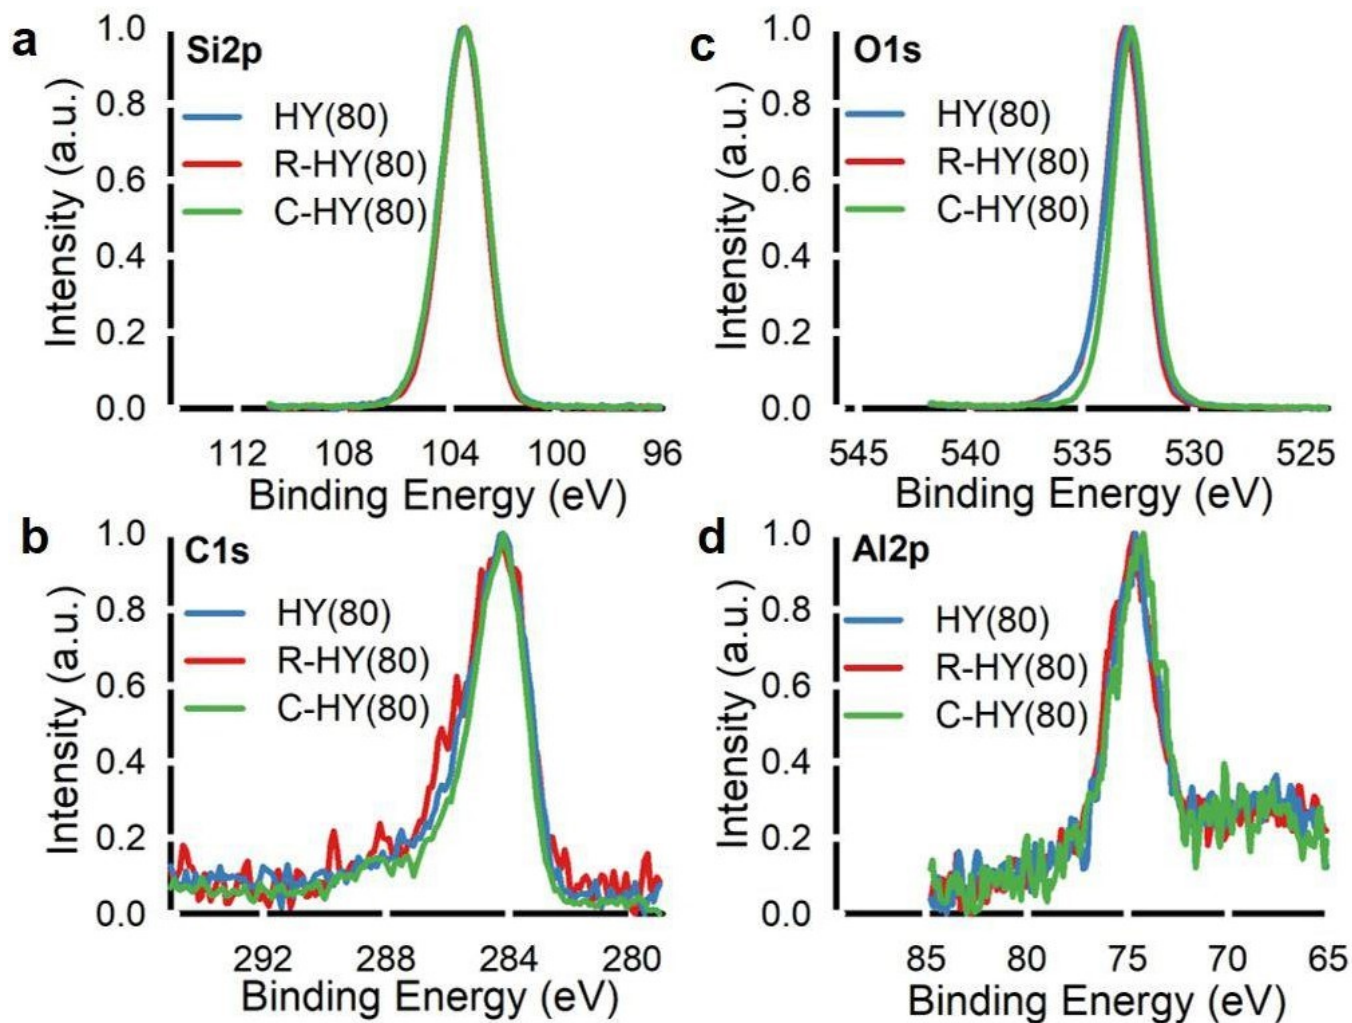

Supplementary Fig. 8 XPS spectra comparison for Si2p (a), C1s (b), O1s (c) and Al2p (d) over HY(80), R-HY(80), and C-HY(80).

Supplementary Table 11 XPS elemental identification and quantification in M2

| Name  | Structure                              | Peak BE<br>eV | FWHM<br>eV | Area (P), CPS<br>eV | Atomic % |
|-------|----------------------------------------|---------------|------------|---------------------|----------|
| Al2p  | Al in zeolite                          | 74.9          | 2.43       | 3200                | 1.1      |
| Si2p3 | Si in zeolite                          | 103.1         | 1.97       | 92000               | 29.5     |
| C1s A | C-C                                    | 284.5         | 1.74       | 10000               | 2.1      |
| C1s B | C-O                                    | 285.9         | 1.74       | 5900                | 1.2      |
| C1s C | C=O                                    | 287.7         | 1.74       | 2000                | 0.4      |
| C1s D | O-C=O                                  | 289.3         | 1.74       | 1200                | 0.2      |
| O1s A | O in zeolite                           | 532.6         | 2.05       | 840000              | 64.8     |
| Na1s  | Na from NaOH                           | 1072.5        | 2.61       | 13000               | 0.4      |
| N1s   | N from NH <sub>3</sub> NO <sub>3</sub> | 401.5         | 3.35       | 1500                | 0.2      |

Abbreviations: BE, binding energy; FWHM, full-width-at-half-maximum; CPS, counts per second

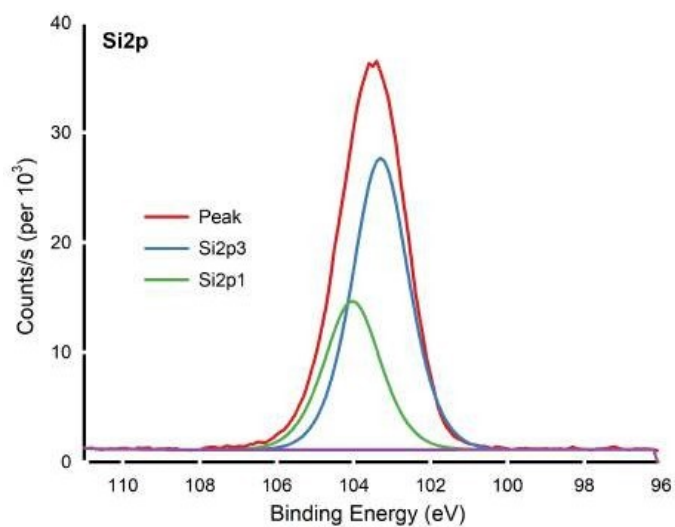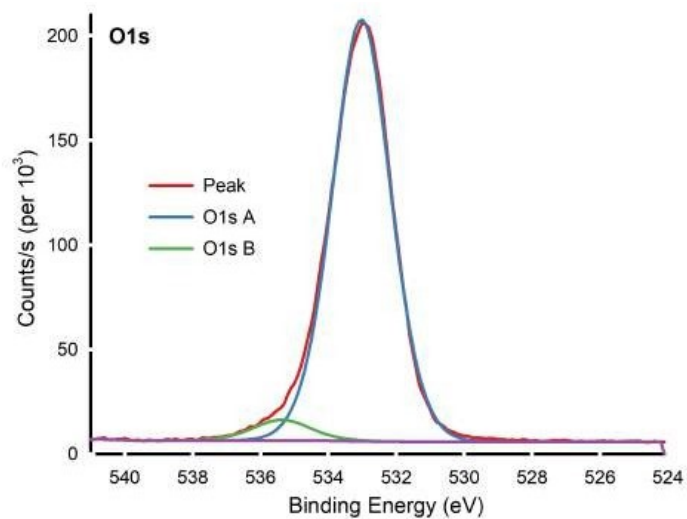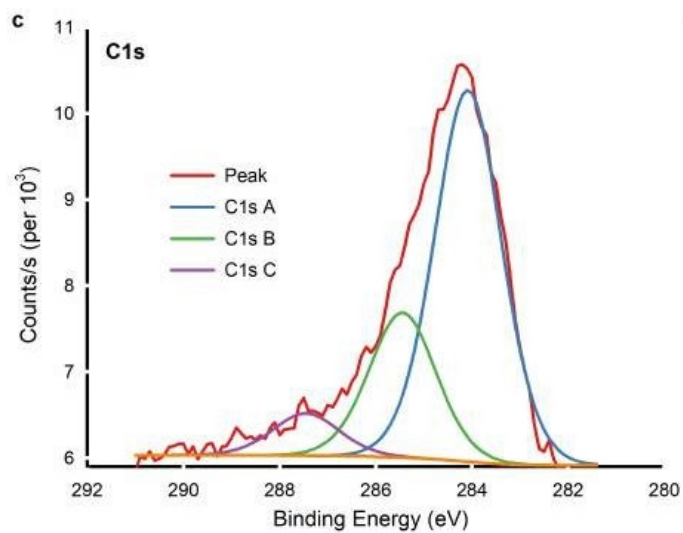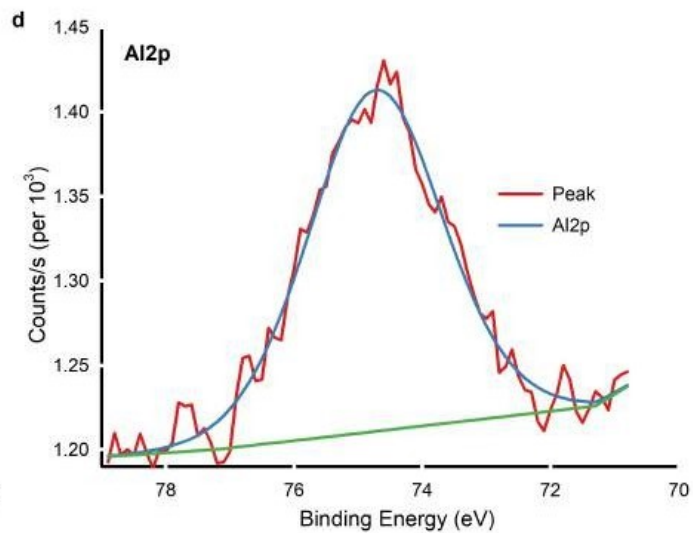

Supplementary Fig. 9 XPS of HY(80)

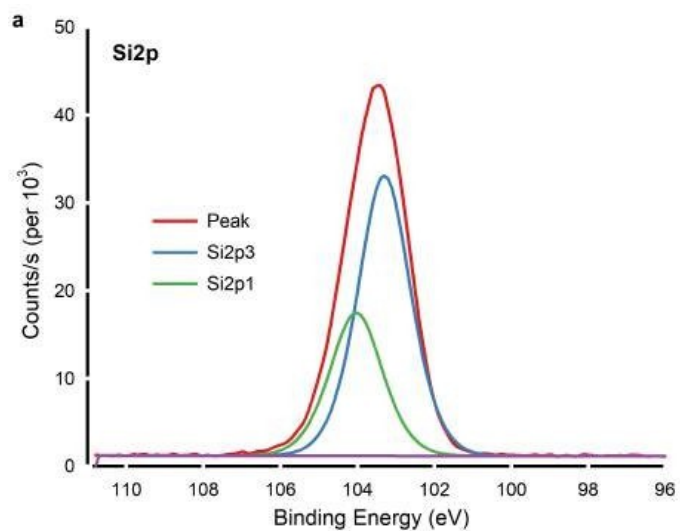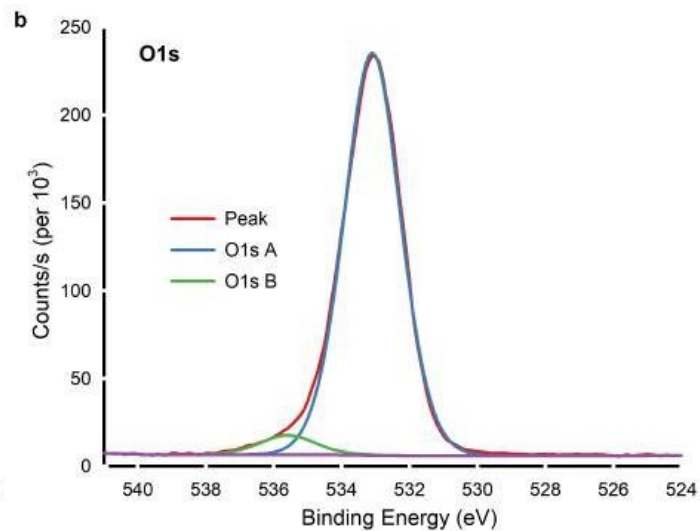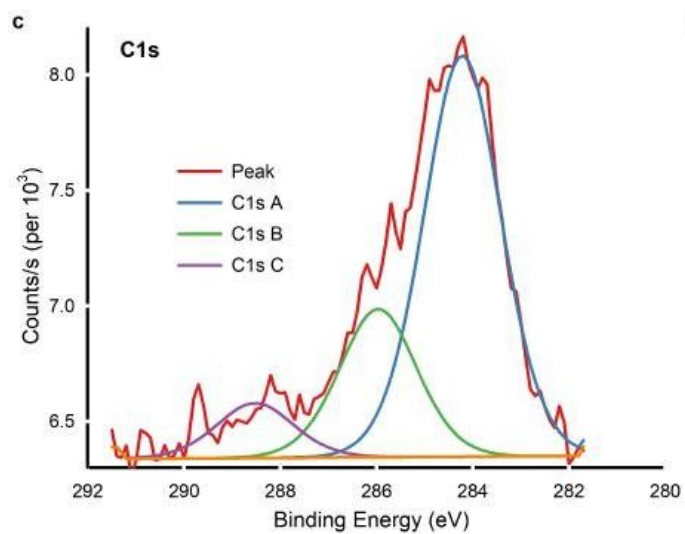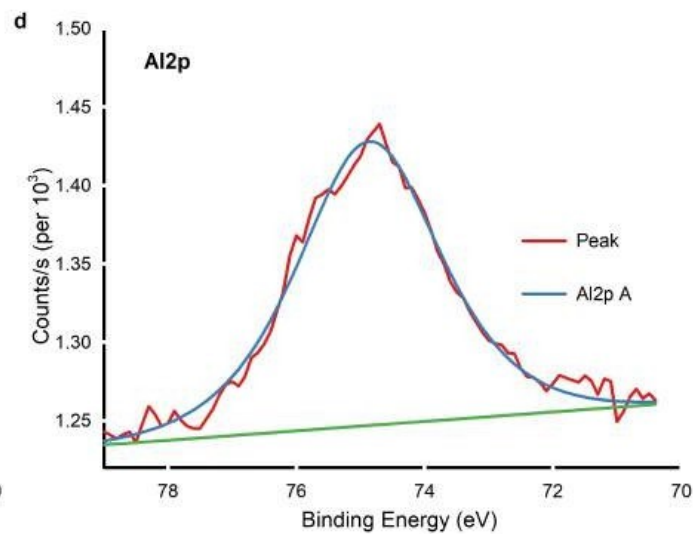

Supplementary Fig. 10 XPS of R-HY(80)

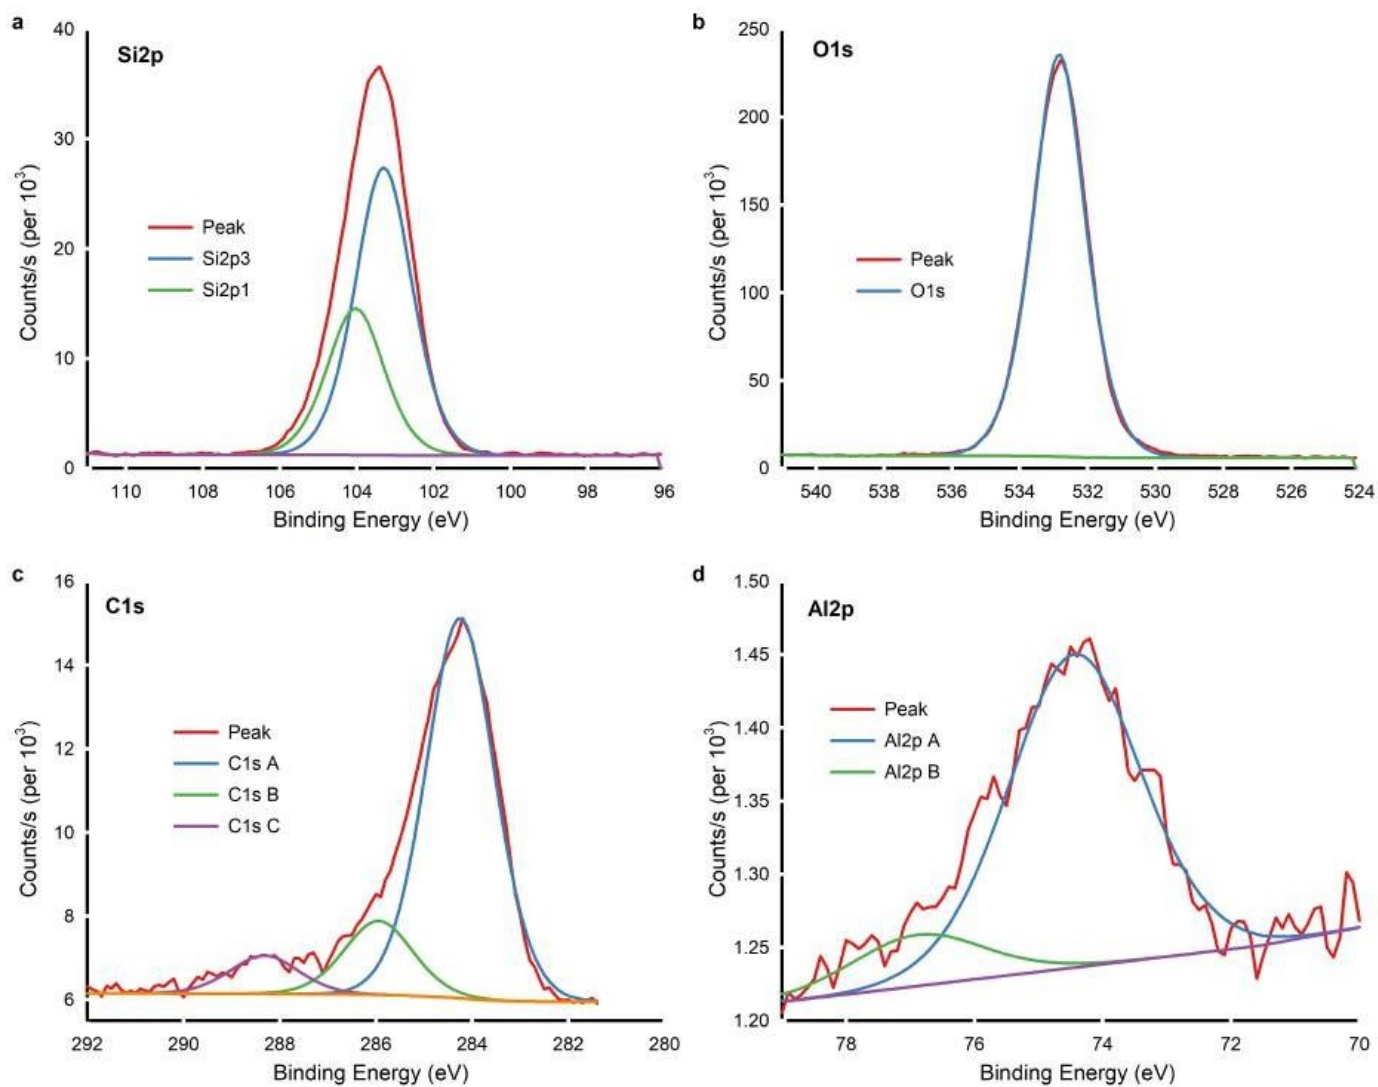

Supplementary Fig. 11 XPS of C-HY(80)
